# Supplementary material for: Preclinical testing of the glycogen synthase kinase-3β inhibitor tideglusib for rhabdomyosarcoma
Source: PubMed Central journal article supplement (PMC5609896; doi:10.18632/oncotarget.18520), 2017-06-16
Supplement: oncotarget-08-62976-s001.pdf [file oncotarget-08-62976-s001.pdf]

## Preclinical testing of the glycogen synthase kinase-3 $\beta$ inhibitor tideglusib for rhabdomyosarcoma

### SUPPLEMENTARY MATERIALS

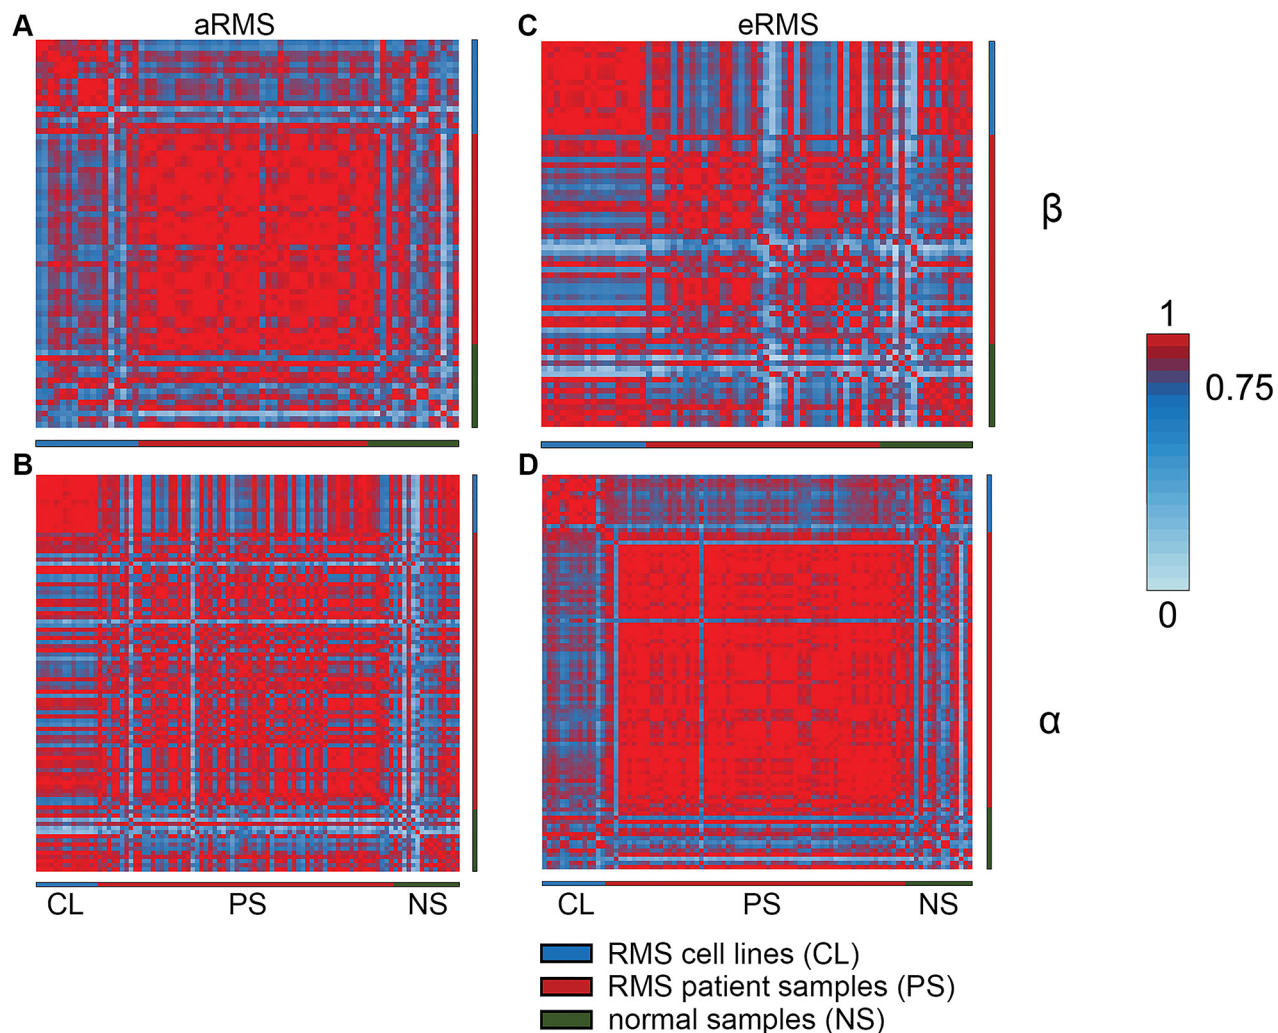

**Supplementary Figure 1: Pearson correlation coefficients of GSK3 $\alpha$  and GSK3 $\beta$  isoform expression of all samples.** Breakdown between sample types (RMS cell line, RMS patient sample, normal muscle) is indicated by thin black lines and by the color-coded bars to the right and bottom of each figure. The heat scale is given on the side, ranging from light blue (no correlation), to dark blue (some correlation), to red (complete correlation). **(A)** Correlation coefficients of 4 GSK3 $\beta$  isoforms in all aRMS samples. **(B)** Correlation coefficients of 4 GSK3 $\alpha$  isoforms in all aRMS samples. **(C)** Correlation coefficients of 4 GSK3 $\beta$  isoforms in all eRMS samples. **(D)** Correlation coefficients of 4 GSK3 $\alpha$  isoforms in all eRMS samples.

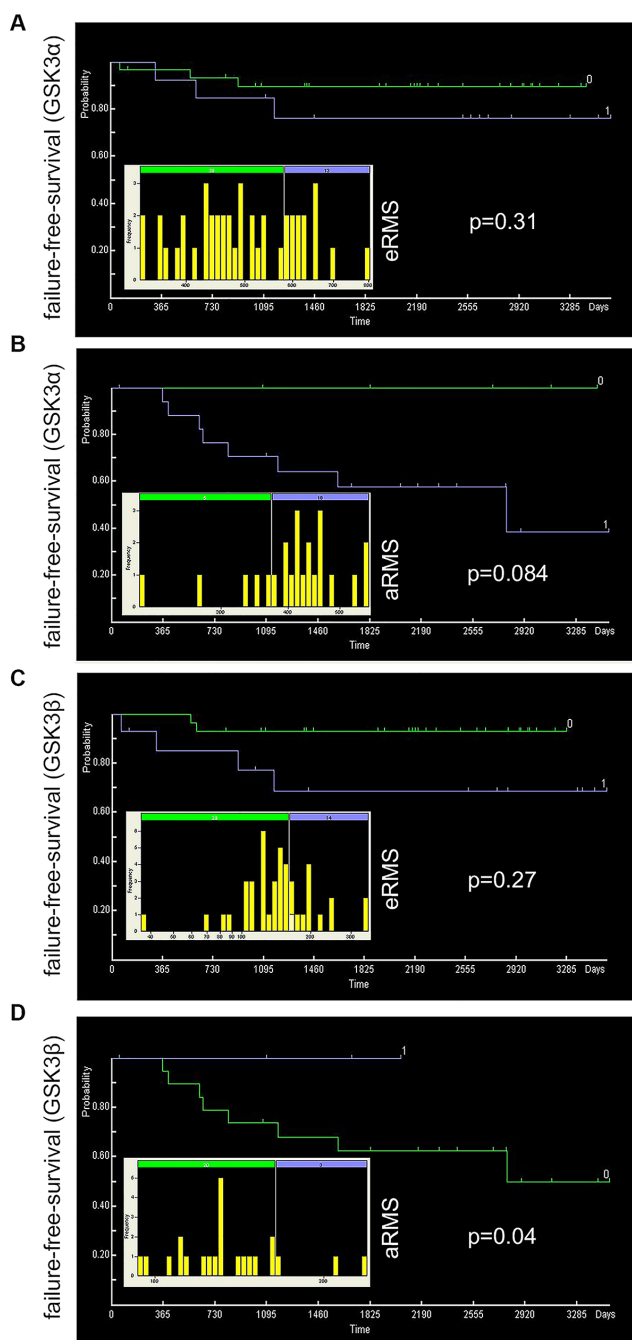

**Supplementary Figure 2: Kaplan-Meier survival curves of fusion-positive and fusion-negative human RMS cases stratified by binary GSK3 $\alpha$  and GSK3 $\beta$  gene expression.** (A) Kaplan-Meier survival curves of fusion-negative RMS segmented by high versus low (threshold = 580) GSK3 $\alpha$  expression. (B) Kaplan-Meier survival curves of fusion-positive RMS segmented by high versus low (threshold = 375) GSK3 $\alpha$  expression. (C) Kaplan-Meier survival curves of fusion-negative RMS segmented by high versus low (threshold = 167) GSK3 $\beta$  expression. (D) Kaplan-Meier survival curves of fusion-positive RMS segmented by high versus low (threshold = 170) GSK3 $\beta$  expression. Higher expression of GSK3 $\beta$  correlated with improved outcome in the aRMS patients.

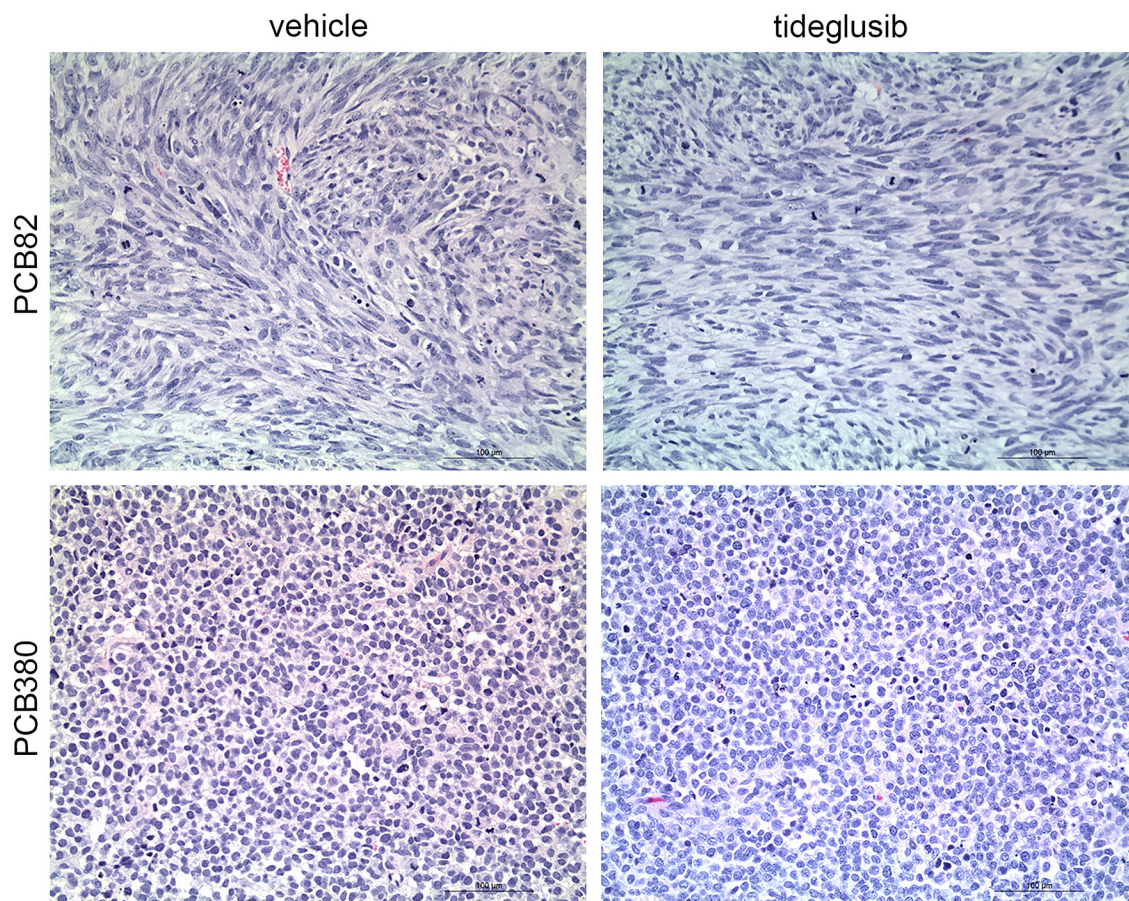

**Supplementary Figure 3: Representative histology of tumors from eRMS and aRMS mice treated with vehicle and tideglusib.** Samples were collected from mice upon necropsy at study completion. Tumors were stained by hematoxylin and eosin and scored by a pathologist. No rhabdomyoblasts visible in tideglusib treated cells. Scale bar = 100 µm.

**Supplementary Table 1: GSK $\alpha/\beta$  expression and its correlation with clinical outcome**

| Gene          | Disease subtype | Threshold | p-value |
|---------------|-----------------|-----------|---------|
| GSK3 $\alpha$ | Fusion positive | 375       | 0.084   |
| GSK3 $\alpha$ | Fusion negative | 580       | 0.31    |
| GSK3 $\beta$  | Fusion positive | 170       | 0.04    |
| GSK3 $\beta$  | Fusion negative | 167       | 0.27    |

Tabulation of the expression of each gene in two patient segments (fusion-positive RMS and fusion-negative RMS) with the corresponding survival of the patient segments.

**Supplementary Table 2: *GSK3 $\alpha$*  expression in PCB380**

| Transcript ID             | Gene ID               | TPM   | FPKM  |
|---------------------------|-----------------------|-------|-------|
| ENST00000222330_GSK3A-001 | ENSG00000105723_GSK3A | 30.84 | 24.02 |
| ENST00000398249_GSK3A-002 | ENSG00000105723_GSK3A | 1.44  | 1.12  |
| ENST00000453535_GSK3A-003 | ENSG00000105723_GSK3A | 2.26  | 1.76  |
| ENST00000493059_GSK3A-004 | ENSG00000105723_GSK3A | 14.22 | 11.07 |

Tabulation of the pattern of expression of *GSK3 $\alpha$*  splice variants. TPM (Transcripts per Million); FPKM (Fragments per Kiliobase Million).

**Supplementary Table 3: *GSK3 $\beta$*  expression in PCB380**

| Transcript ID             | Gene ID               | TPM  | FPKM |
|---------------------------|-----------------------|------|------|
| ENST00000264235_GSK3B-001 | ENSG00000082701_GSK3B | 8.56 | 6.66 |
| ENST00000316626_GSK3B-002 | ENSG00000082701_GSK3B | 0    | 0    |
| ENST00000474830_GSK3B-003 | ENSG00000082701_GSK3B | 0.19 | 0.15 |
| ENST00000473886_GSK3B-004 | ENSG00000082701_GSK3B | 0.37 | 0.29 |

Tabulation of the pattern of expression of *GSK3 $\beta$*  splice variants. TPM (Transcripts per Million); FPKM (Fragments per Kiliobase Million).

**Supplementary Table 4: *GSK3 $\alpha$*  expression in PCB82**

| Transcript ID             | Gene ID               | TPM   | FPKM  |
|---------------------------|-----------------------|-------|-------|
| ENST00000222330_GSK3A-001 | ENSG00000105723_GSK3A | 30.99 | 23.36 |
| ENST00000398249_GSK3A-002 | ENSG00000105723_GSK3A | 1.24  | 0.94  |
| ENST00000453535_GSK3A-003 | ENSG00000105723_GSK3A | 1.2   | 0.91  |
| ENST00000493059_GSK3A-004 | ENSG00000105723_GSK3A | 29.44 | 22.19 |

Tabulation of the pattern of expression of *GSK3 $\alpha$*  splice variants. TPM (Transcripts per Million); FPKM (Fragments per Kiliobase Million).

**Supplementary Table 5: *GSK3 $\beta$*  expression in PCB82**

| Transcript ID             | Gene ID               | TPM   | FPKM |
|---------------------------|-----------------------|-------|------|
| ENST00000264235_GSK3B-001 | ENSG00000082701_GSK3B | 10.03 | 7.56 |
| ENST00000316626_GSK3B-002 | ENSG00000082701_GSK3B | 0.18  | 0.14 |
| ENST00000473886_GSK3B-004 | ENSG00000082701_GSK3B | 1.22  | 0.92 |
| ENST00000474830_GSK3B-003 | ENSG00000082701_GSK3B | 0     | 0    |

Tabulation of the pattern of expression of *GSK3 $\beta$*  splice variants. TPM (Transcripts per Million); FPKM (Fragments per Kiliobase Million).

**Supplementary Table 6: Histological markers of differentiation in eRMS/aRMS PDX mice**

| Animal  | Model | Treatment  | Tumor morphology | % Rhabdomyoblasts | Lung metastases | Met with % Rhabdomyoblasts |
|---------|-------|------------|------------------|-------------------|-----------------|----------------------------|
| 165-001 | aRMS  | Tideglusib | Round cell       | 0                 | 0               | None                       |
| 165-002 | aRMS  | Tideglusib | Round cell       | 0                 | 0               | None                       |
| 165-004 | aRMS  | Vehicle    | Round cell       | 0                 | 0               | None                       |
| 165-016 | aRMS  | Vehicle    | Round cell       | 0                 | 0               | None                       |
| 165-019 | aRMS  | Vehicle    | Round cell       | 0                 | 0               | None                       |
| 165-021 | aRMS  | Vehicle    | Round cell       | 0                 | 0               | None                       |
| G1-009  | eRMS  | Vehicle    | Spindle cell     | 0                 | 0               | None                       |
| G1-013  | eRMS  | Vehicle    | Spindle cell     | 0                 | 0               | None                       |
| G1-017  | eRMS  | Vehicle    | Spindle cell     | 0                 | 0               | None                       |
| G2-03   | eRMS  | Tideglusib | Spindle cell     | 0                 | 0               | None                       |
| G2-019  | eRMS  | Tideglusib | Spindle cell     | 0                 | 0               | None                       |
| G2-021  | eRMS  | Tideglusib | Spindle cell     | 0                 | 0               | None                       |

eRMS/aRMS mice received vehicle and tideglusib. After reaching study endpoints mice were euthanized and their tumors were surveyed for the percentage (%) of rhabdomyoblasts. 500 to 3,000 cells were counted under low and higher magnification on each slide. This count excluded endothelial cells and inflammatory cells.
